# Supplementary material for: Testosterone identifies hatchling sex for Mojave desert tortoises (Gopherus agassizii)
Source: PubMed Central journal article supplement (PMC10491821; doi:10.1038/s41598-023-41677-2), 2023-09-08
Supplement: 41598_2023_41677_MOESM1_ESM.pdf [file 41598_2023_41677_MOESM1_ESM.pdf]

## **Testosterone identifies hatchling sex for Mojave desert tortoises (*Gopherus agassizii*)**

M. A. Walden<sup>1,2, \*</sup>, Kevin J. Loope<sup>3,4</sup>, Elizabeth A. Hunter<sup>5</sup>, Stephen J. Divers<sup>6</sup>, Jessica R. Comolli<sup>6,7</sup>, Todd C. Esque<sup>8</sup>, and Kevin T. Shoemaker<sup>1</sup>

Department of Natural Resources and Environmental Science, University of Nevada—Reno, Reno, NV, USA

<sup>2</sup> Present Address: Department of Fisheries Biology, California State Polytechnic University—Humboldt, Arcata, CA, United States

<sup>3</sup> Department of Fish and Wildlife Conservation, Virginia Tech, Blacksburg, VA, USA

<sup>4</sup> Department of Biology, Georgia Southern University, Statesboro, GA, USA

<sup>5</sup> U.S. Geological Survey, Virginia Cooperative Fish and Wildlife Research Unit, Department of Fish and Wildlife Conservation, Virginia Tech, Blacksburg, VA, USA

<sup>6</sup> Department of Small Animal Medicine and Surgery, College of Veterinary Medicine, University of Georgia, Athens, GA, USA

<sup>7</sup> Present Address: Department of Veterinary Services, Miami Seaquarium, Key Biscayne, FL, USA

<sup>8</sup> U.S. Geological Survey, Western Ecological Research Center, Boulder City, NV, USA

\* mar.walden@gmail.com

## Supplementary Information

**Supplementary Table S1.** Permutation *t*-test for paired pre- and post-follicle-stimulating hormone (FSH) challenge blood plasma samples from captive hatchling (0–3 mo old) Mojave desert tortoises (*Gopherus agassizii*) collected in Clark Co., Nevada, USA in 2019. Sex was confirmed by ceolioscopy in 2021. Samples are from unexposed individuals and 4 hr after injection of FSH.

| <b>Sex</b>                       | <b><i>n</i></b> | <b>Average absolute difference pre- to post-FSH challenge</b> | <b>Average percent difference pre- to post-FSH challenge</b> |
|----------------------------------|-----------------|---------------------------------------------------------------|--------------------------------------------------------------|
| Female                           | 6               | 37.68 pg/mL                                                   | 422.95%                                                      |
| Male                             | 17              | 703.45 pg/mL                                                  | 197.11%                                                      |
| <b>Permutation <i>t</i>-test</b> |                 | <b>95% Confidence Interval</b>                                | <b><i>P</i>-value</b>                                        |
| Absolute difference              |                 | –1,205.12–122.30 pg/mL                                        | < 0.001                                                      |
| Percent difference               |                 | –5.00–585.92 pg/mL                                            | 0.497                                                        |
